# Supplementary material for: Knockdown of LAP2α inhibits osteogenic differentiation of human adipose-derived stem cells by activating NF-κB
Source: PubMed Central journal article supplement (PMC7329510; doi:10.1186/s13287-020-01774-9), 2020-07-01

**Figure S1**

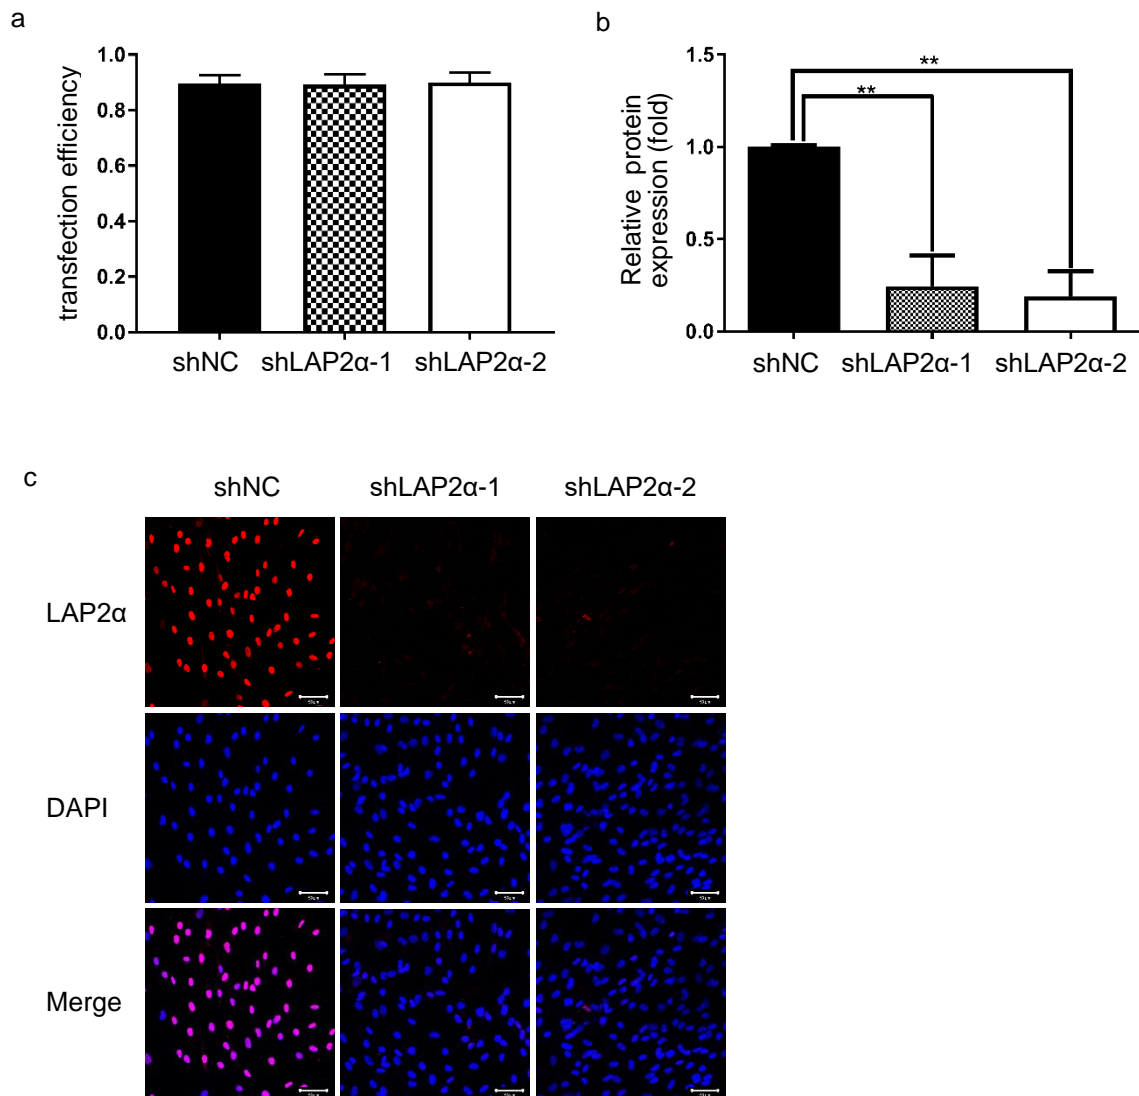

Supplement: 13287_2020_1774_MOESM1_ESM.pdf [file 13287_2020_1774_MOESM1_ESM.pdf]
